# Supplementary material for: Hydrolysis of cis- and transplatin: structure and reactivity of the aqua complexes in a solvent free environment
Source: Royal Society of Chemistry journal article supplement (doi:10.1039/c7ra01182b), 2017-01-01
Supplement: c7ra01182b1.pdf [file c7ra01182b1.pdf]

## Electronic Supplementary Information

### Hydrolysis of cis- and transplatin: structure and reactivity of the aqua complexes in a solvent free environment

D. Corinti,<sup>a</sup> C. Coletti,<sup>b</sup> N. Re,<sup>b</sup> S. Piccirillo,<sup>c</sup> M. Giampà,<sup>ad</sup> M. E. Crestoni<sup>a</sup> and S. Fornarini<sup>\*a</sup>

<sup>a</sup> *Dipartimento di Chimica e Tecnologie del Farmaco, Università degli Studi di Roma "La Sapienza", P.le A. Moro 5, I-00185 Roma, Italy. E-mail: [simonetta.fornarini@uniroma1.it](mailto:simonetta.fornarini@uniroma1.it)*

<sup>b</sup> *Dipartimento di Farmacia, Università G. D'Annunzio, Via dei Vestini 31, I-66100 Chieti, Italy.*

<sup>c</sup> *Dip. di Scienze e Tecnologie Chimiche, Università di Roma "Tor Vergata", via della Ricerca Scientifica, 00133 Rome, Italy.*

<sup>d</sup> *Proteom- und Metabolomforschung, Fakultät für Biologie, Centrum für Biotechnologie (CeBITec), Universität Bielefeld, Universitätsstraße 27, Bielefeld, Germany*

#### Contents:

|                                                                                                                                                                                                                                                                                    |       |
|------------------------------------------------------------------------------------------------------------------------------------------------------------------------------------------------------------------------------------------------------------------------------------|-------|
| Complete reference [32].....                                                                                                                                                                                                                                                       | p.S2  |
| Figure S1: High resolution mass spectrum of <i>cis</i> -[Pt(OH)(NH <sub>3</sub> ) <sub>2</sub> (H <sub>2</sub> O)] <sup>+</sup> .....                                                                                                                                              | p. S2 |
| Figure S2: CID mass spectra of <i>cis</i> -[Pt(OH)(NH <sub>3</sub> ) <sub>2</sub> (H <sub>2</sub> O)] <sup>+</sup> and <i>trans</i> -[Pt(OH)(NH <sub>3</sub> ) <sub>2</sub> (H <sub>2</sub> O)] <sup>+</sup> .....                                                                 | p. S3 |
| Scheme S1: Optimized geometries and relative energies at 298K for the dissociation reaction of water from <i>cis</i> and <i>trans</i> -[Pt(OH)(NH <sub>3</sub> ) <sub>2</sub> (H <sub>2</sub> O)] <sup>+</sup> .....                                                               | p. S4 |
| Table S1: Theoretically calculated thermodynamic parameters for the most stable structures of sampled Pt(II) complexes.....                                                                                                                                                        | p. S5 |
| Table S2: Theoretically calculated thermodynamic parameters for the structures of Pt(II) complexes partaking the potential energy profile for the reaction of of <i>cis</i> - and <i>trans</i> -[PtCl(NH <sub>3</sub> ) <sub>2</sub> (H <sub>2</sub> O)] <sup>+</sup> with TA..... | p. S6 |
| Table S3: Cartesian coordinates of aqua complexes from hydrolysis of cis- and transplatin and related species.<br>.....                                                                                                                                                            | p. S7 |
| Table S4: Cartesian coordinates of Pt <sup>II</sup> -complexes and related species of species partaking the potential energy profile for the reaction of <i>cis</i> - and <i>trans</i> -[PtCl(NH <sub>3</sub> ) <sub>2</sub> (H <sub>2</sub> O)] <sup>+</sup> with TA.....         | p. S9 |

Complete reference [32]

M. J. Frisch, G. W. Trucks, H. B. Schlegel, G. E. Scuseria, M. A. Robb, J. R. Cheeseman, G. Scalmani, V. Barone, B. Mennucci, G. A. Petersson, H. Nakatsuji, M. Caricato, X. Li, H. P. Hratchian, A. F. Izmaylov, J. Bloino, G. Zheng, J. L. Sonnenberg, M. Hada, M. Ehara, K. Toyota, R. Fukuda, J. Hasegawa, M. Ishida, T. Nakajima, Y. Honda, O. Kitao, H. Nakai, T. Vreven, J. A. Montgomery, Jr., J. E. Peralta, F. Ogliaro, M. Bearpark, J. J. Heyd, E. Brothers, K. N. Kudin, V. N. Staroverov, R. Kobayashi, J. Normand, K. Raghavachari, A. Rendell, J. C. Burant, S. S. Iyengar, J. Tomasi, M. Cossi, N. Rega, J. M. Millam, M. Klene, J. E. Knox, J. B. Cross, V. Bakken, C. Adamo, J. Jaramillo, R. Gomperts, R. E. Stratmann, O. Yazyev, A. J. Austin, R. Cammi, C. Pomelli, J. W. Ochterski, R. L. Martin, K. Morokuma, V. G. Zakrzewski, G. A. Voth, P. Salvador, J. J. Dannenberg, S. Dapprich, A. D. Daniels, Ö. Farkas, J. B. Foresman, J. V. Ortiz, J. Cioslowski, D. J. Fox, Gaussian 09, Revision D.01, Gaussian, Inc., Wallingford CT, 2009.

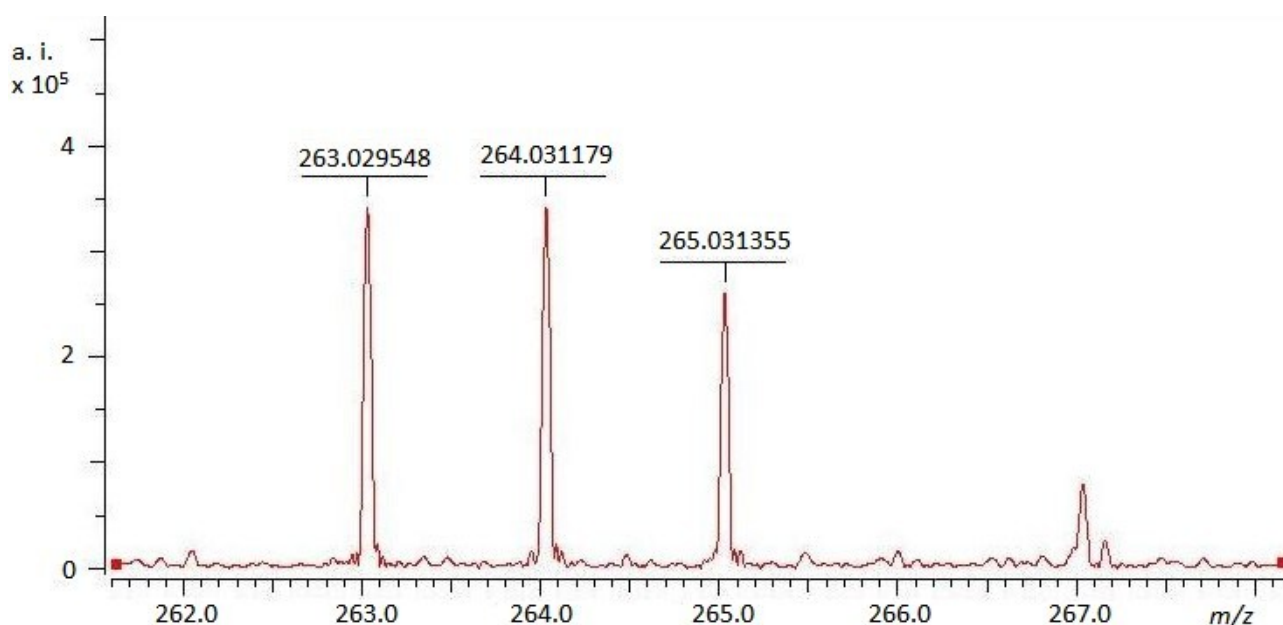

Figure S1. High resolution mass spectrum of *cis*-[Pt(OH)(NH<sub>3</sub>)<sub>2</sub>(H<sub>2</sub>O)]<sup>+</sup>. Calculated m/z values are: 263.029082 Da (<sup>194</sup>Pt<sup>14</sup>N<sub>2</sub><sup>1</sup>H<sub>9</sub><sup>16</sup>O<sub>2</sub>); 264.031194 Da (<sup>195</sup>Pt<sup>14</sup>N<sub>2</sub><sup>1</sup>H<sub>9</sub><sup>16</sup>O<sub>2</sub>); 265.031354 Da (<sup>196</sup>Pt<sup>14</sup>N<sub>2</sub><sup>1</sup>H<sub>9</sub><sup>16</sup>O<sub>2</sub>). The deviation between experimental and calculated values is always within 2 ppm.

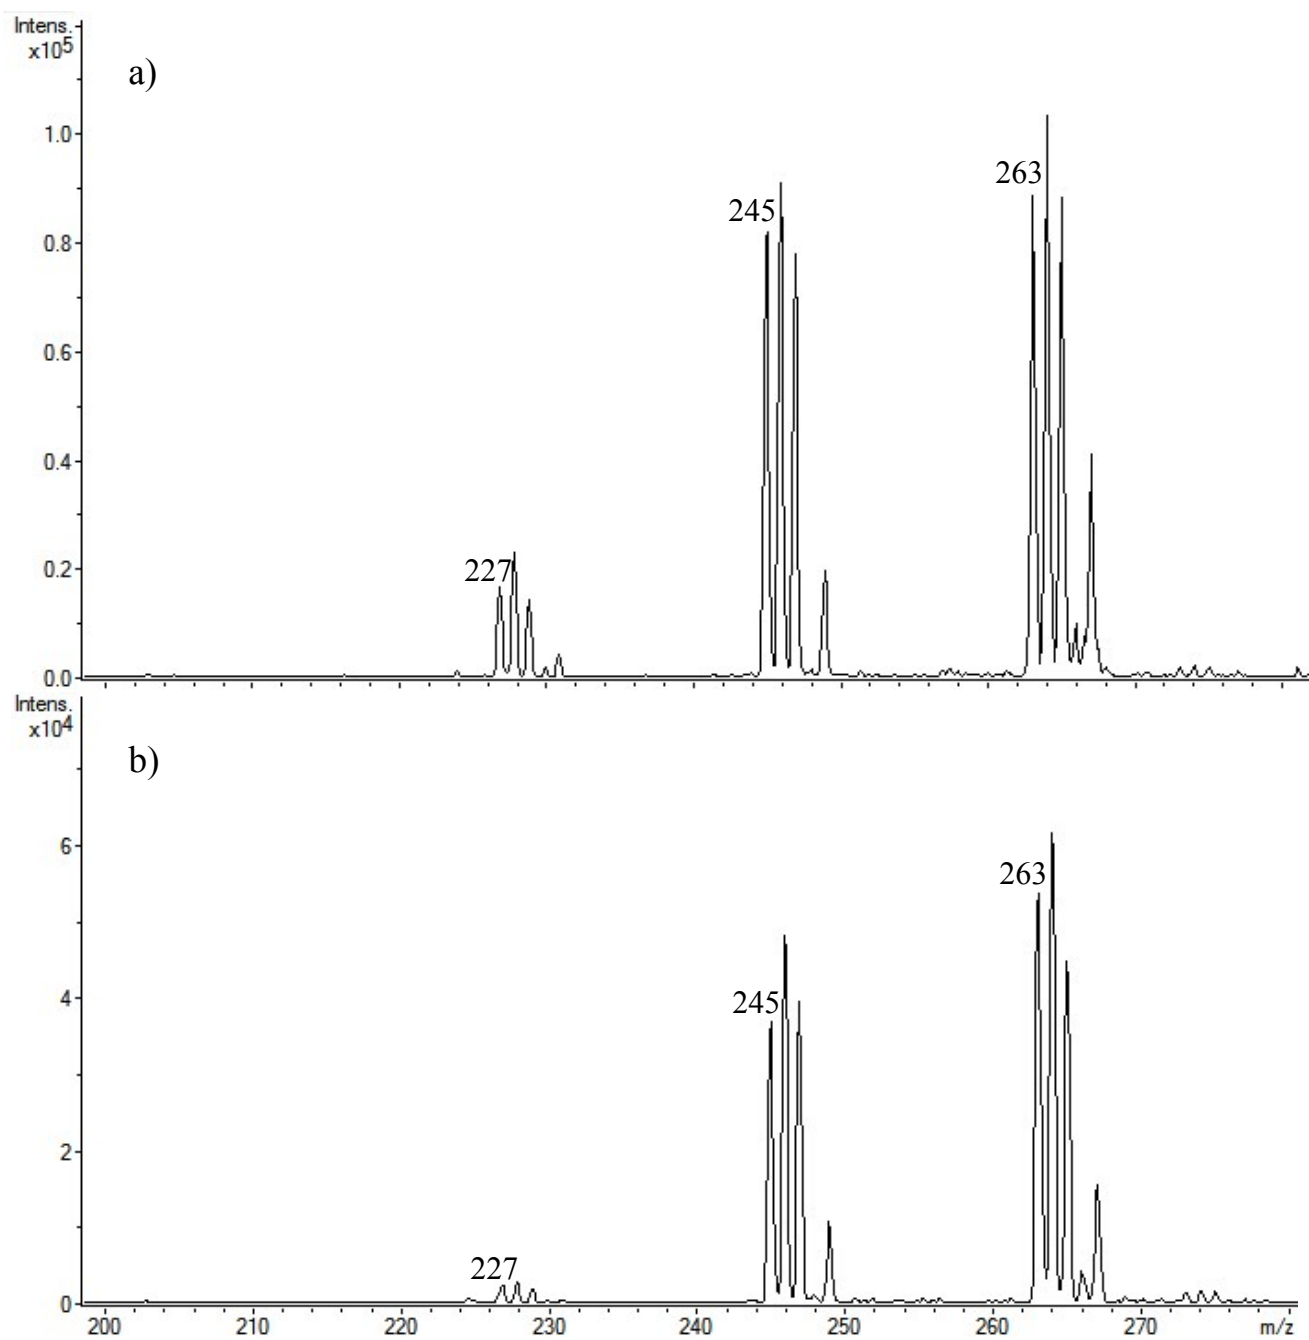

Figure S2. CID mass spectra of a) *cis*-[Pt(OH)(NH<sub>3</sub>)<sub>2</sub>(H<sub>2</sub>O)]<sup>+</sup> and b) *trans*-[Pt(OH)(NH<sub>3</sub>)<sub>2</sub>(H<sub>2</sub>O)]<sup>+</sup>, recorded in a Paul ion trap (Esquire 6000+, Bruker Daltonics) upon mass selection of the isotopic cluster and activation with a radio frequency amplitude of 0.6.

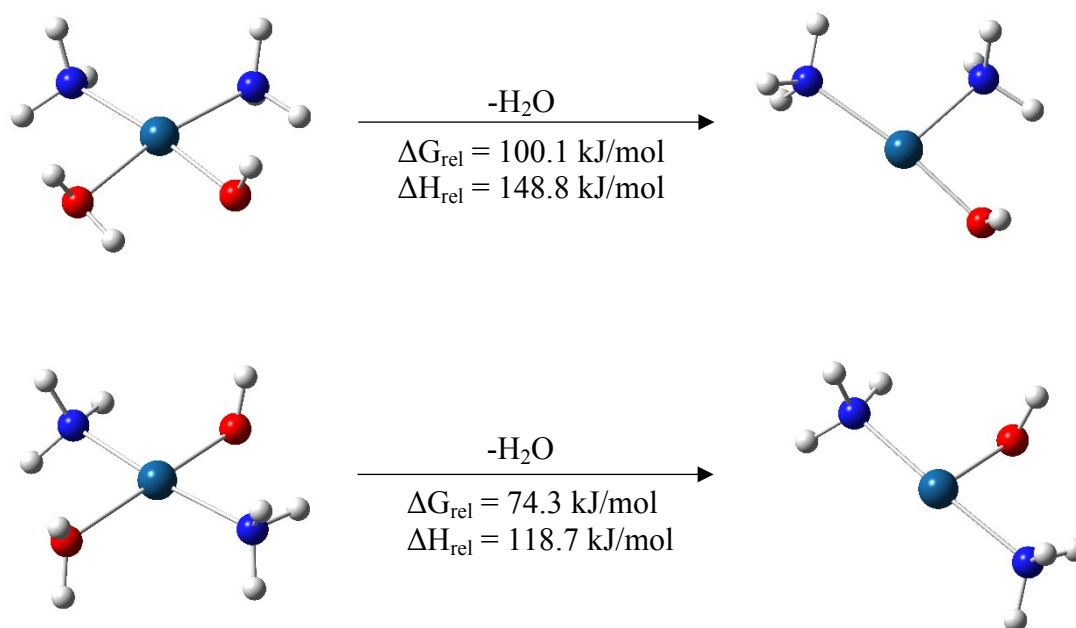

Scheme S1. Optimized geometries and relative energies at 298K for the dissociation reaction of water from *cis* and *trans*-[Pt(OH)(NH<sub>3</sub>)<sub>2</sub>(H<sub>2</sub>O)]<sup>+</sup>.

Table S1. Theoretically calculated thermodynamic parameters for the most stable structures of sampled Pt(II) complexes. Calculation performed at B3LYP/aug-cc-pVTZ(-PP) level.

| B3LYP/aug-cc-pVTZ(-PP)                                                                                              |                     |                              |                                |                                  |                                       |                      |                          |                                          |
|---------------------------------------------------------------------------------------------------------------------|---------------------|------------------------------|--------------------------------|----------------------------------|---------------------------------------|----------------------|--------------------------|------------------------------------------|
| Species                                                                                                             | Energy <sup>a</sup> | Relative Energy <sup>b</sup> | Zero-point Energy <sup>b</sup> | Enthalpy Correction <sup>b</sup> | Relative Enthalpy <sup>b</sup> (298K) | Entropy <sup>c</sup> | H-TS <sup>b</sup> (298k) | Relative Free Energy <sup>b</sup> (298K) |
| H <sub>2</sub> O                                                                                                    | -76.466197          | 0.0                          | 55.76                          | 65.68                            | 0.00                                  | 194.50               | 7.72                     | 0.00                                     |
| H <sub>2</sub> <sup>18</sup> O                                                                                      | -76.466197          | 0.0                          | 55.58                          | 65.50                            | 0.18                                  | 195.89               | 7.12                     | 0.60                                     |
| <i>cis</i> -[Pt(OH)(NH <sub>3</sub> ) <sub>2</sub> (H <sub>2</sub> O)] <sup>+</sup>                                 | -384.855559         | 5.5                          | 313.05                         | 340.53                           | 6.60                                  | 399.35               | 221.52                   | 7.56                                     |
| <i>cis</i> -[Pt(OH)(NH <sub>3</sub> ) <sub>2</sub> (H <sub>2</sub> <sup>18</sup> O)] <sup>+</sup>                   | -384.855559         | 0.0                          | 312.64                         | 340.19                           | 6.26                                  | 400.45               | 220.86                   | 6.89                                     |
| <i>trans</i> -[Pt(OH)(NH <sub>3</sub> ) <sub>2</sub> (H <sub>2</sub> O)] <sup>+</sup>                               | -384.857664         | 0.0                          | 311.09                         | 339.46                           | 0.00                                  | 402.57               | 219.49                   | 0.00                                     |
| <i>cis</i> -[Pt(OH)(NH <sub>3</sub> ) <sub>2</sub> (H <sub>2</sub> O)] <sup>+</sup> ·H <sub>2</sub> O               | -461.351465         | 0.0                          | 380.00                         | 412.17                           | 0.00                                  | 431.82               | 283.49                   | 0.00                                     |
| <i>cis</i> -[Pt(OH)(NH <sub>3</sub> ) <sub>2</sub> (H <sub>2</sub> O)] <sup>+</sup> ·H <sub>2</sub> <sup>18</sup> O | -461.351465         | 0.0                          | 379.55                         | 411.83                           | -0.34                                 | 432.93               | 282.82                   | -0.67                                    |
| <i>cis</i> -[Pt(OH)(NH <sub>3</sub> ) <sub>2</sub> (H <sub>2</sub> <sup>18</sup> O)] <sup>+</sup> ·H <sub>2</sub> O | -461.351465         | 0.0                          | 379.68                         | 411.92                           | -0.25                                 | 433.09               | 282.86                   | -0.63                                    |
| TS                                                                                                                  | -461.314935         | 95.9                         | 375.68                         | 408.85                           | 92.59                                 | 436.49               | 278.77                   | 91.19                                    |
| TS-H <sub>2</sub> <sup>18</sup> O                                                                                   | -461.314935         | 95.9                         | 375.36                         | 408.61                           | 92.35                                 | 437.67               | 278.19                   | 90.61                                    |
| <i>cis</i> -[Pt(OH)(NH <sub>3</sub> ) <sub>2</sub> ] <sup>+</sup>                                                   | -308.329253         | 37.03                        | 243.60                         | 265.85                           | 36.75                                 | 368.50               | 156.04                   | 33.27                                    |
| <i>trans</i> -[Pt(OH)(NH <sub>3</sub> ) <sub>2</sub> ] <sup>+</sup>                                                 | -308.343356         | 0.00                         | 244.49                         | 266.13                           | 0.00                                  | 356.83               | 159.80                   | 0.00                                     |

<sup>a</sup> Electronic energy at 0K. In Hartree particle<sup>-1</sup>. <sup>b</sup> In kJ mol<sup>-1</sup>. <sup>c</sup> In J mol<sup>-1</sup>K<sup>-1</sup>.

Table S2. Theoretically calculated thermodynamic parameters for the structures of sampled Pt(II) complexes partaking the profile for the reaction of *cis*- and *trans*-[PtCl(NH<sub>3</sub>)<sub>2</sub>(H<sub>2</sub>O)]<sup>+</sup> with TA. Calculation performed at  $\omega$ B97X-D/6-311++G\*\* level employing the LanL2TZ PP for the platinum atom.

| $\omega$ B97X-D/6-311++G**                                                              |                     |                              |                                |                                  |                                       |                      |                          |                                          |
|-----------------------------------------------------------------------------------------|---------------------|------------------------------|--------------------------------|----------------------------------|---------------------------------------|----------------------|--------------------------|------------------------------------------|
| Species                                                                                 | Energy <sup>a</sup> | Relative Energy <sup>b</sup> | Zero-point Energy <sup>b</sup> | Enthalpy Correction <sup>b</sup> | Relative Enthalpy <sup>b</sup> (298K) | Entropy <sup>c</sup> | H-TS <sup>b</sup> (298k) | Relative Free Energy <sup>b</sup> (298K) |
| H <sub>2</sub> O                                                                        | -76.432249          | -                            | 56.91                          | 66.83                            | -                                     | 188.62               | 10.62                    | -                                        |
| TA                                                                                      | -669.726987         | -                            | 341.08                         | 363.98                           | -                                     | 374.82               | 252.28                   | -                                        |
| <i>cis</i> -[PtCl(NH <sub>3</sub> ) <sub>2</sub> (H <sub>2</sub> O)] <sup>+</sup>       | -768.790763         | 5.24                         | 284.99                         | 312.61                           | 6.40                                  | 407.87               | 191.06                   | 9.22                                     |
| <i>trans</i> -[PtCl(NH <sub>3</sub> ) <sub>2</sub> (H <sub>2</sub> O)] <sup>+</sup>     | -768.792760         | 0.00                         | 282.97                         | 311.45                           | 0.00                                  | 417.31               | 187.09                   | 0.00                                     |
| <i>cis</i> -[PtCl(NH <sub>3</sub> ) <sub>2</sub> (H <sub>2</sub> O)] <sup>+</sup> ·TA   | -1438.563406        | 56.95                        | 632.30                         | 681.67                           | 57.43                                 | 580.21               | 508.77                   | 65.49                                    |
| <i>trans</i> -[PtCl(NH <sub>3</sub> ) <sub>2</sub> (H <sub>2</sub> O)] <sup>+</sup> ·TA | -1438.562430        | 59.51                        | 633.63                         | 682.57                           | 60.89                                 | 581.67               | 509.23                   | 68.51                                    |
| <i>cis</i> -TS                                                                          | -1438.535468        | 130.30                       | 625.50                         | 677.01                           | 126.12                                | 603.26               | 497.24                   | 127.31                                   |
| <i>trans</i> -TS                                                                        | -1438.540908        | 116.02                       | 625.66                         | 677.41                           | 112.24                                | 609.10               | 495.90                   | 111.69                                   |
| <i>cis</i> -[PtCl(NH <sub>3</sub> ) <sub>2</sub> (TA)] <sup>+</sup> ·H <sub>2</sub> O   | -1438.585098        | 0.00                         | 629.25                         | 681.19                           | 0.00                                  | 607.25               | 500.23                   | 0.00                                     |
| <i>trans</i> -[PtCl(NH <sub>3</sub> ) <sub>2</sub> (TA)] <sup>+</sup> ·H <sub>2</sub> O | -1438.582417        | 7.04                         | 629.03                         | 680.87                           | 3.27                                  | 603.70               | 500.97                   | 4.33                                     |
| <i>cis</i> -[PtCl(NH <sub>3</sub> ) <sub>2</sub> (TA)] <sup>+</sup>                     | -1362.125910        | 8.37                         | 562.50                         | 606.95                           | 7.30                                  | 554.04               | 441.85                   | 2.48                                     |
| <i>trans</i> -[PtCl(NH <sub>3</sub> ) <sub>2</sub> (TA)] <sup>+</sup>                   | -1362.129098        | 0.00                         | 564.62                         | 608.02                           | 0.00                                  | 537.85               | 447.74                   | 0.00                                     |

<sup>a</sup> Electronic energy at 0K. In Hartree particle<sup>-1</sup>. <sup>b</sup> In kJ mol<sup>-1</sup>. <sup>c</sup> In J mol<sup>-1</sup>K<sup>-1</sup>.

Table S3. Cartesian coordinates of aqua complexes from hydrolysis of cis- and transplatin and related species.

*cis*-[Pt(OH)(NH<sub>3</sub>)<sub>2</sub>(H<sub>2</sub>O)]<sup>+</sup>

|    |             |             |             |
|----|-------------|-------------|-------------|
| Pt | 0.01237900  | 0.00152800  | 0.01142100  |
| N  | 0.26866600  | 2.10700600  | -0.01843000 |
| H  | -0.56442000 | 2.55146400  | -0.39831200 |
| H  | 1.04202000  | 2.42581800  | -0.59632200 |
| H  | 0.41359100  | 2.49676600  | 0.90996100  |
| N  | 1.98426500  | -0.49634600 | -0.01637600 |
| H  | 2.52176600  | -0.07655200 | -0.77066400 |
| H  | 1.96620800  | -1.50662400 | -0.17530200 |
| H  | 2.47537800  | -0.32316500 | 0.85718200  |
| H  | -2.27734900 | -0.76403000 | -0.35951700 |
| O  | -2.07410800 | 0.15381000  | -0.09049600 |
| H  | -2.51928500 | 0.29306600  | 0.75739300  |
| O  | -0.35178500 | -1.92353900 | -0.11345800 |
| H  | -0.38680600 | -2.33272500 | 0.76000100  |

*trans*-[Pt(OH)(NH<sub>3</sub>)<sub>2</sub>(H<sub>2</sub>O)<sub>2</sub>]<sup>+</sup>

|    |             |             |             |
|----|-------------|-------------|-------------|
| Pt | -0.00853900 | -0.00967400 | 0.00760000  |
| N  | 1.81749000  | -0.97056300 | -0.02444200 |
| H  | 2.46738000  | -0.59795100 | -0.71174600 |
| H  | 1.61084000  | -1.93716900 | -0.27647900 |
| H  | 2.29210300  | -0.97678200 | 0.87489000  |
| H  | 0.89561700  | 2.47993600  | -0.77050600 |
| O  | 1.00138700  | 1.90810900  | -0.00003800 |
| H  | 0.93316600  | 2.45997200  | 0.78882700  |
| O  | -0.84024200 | -1.76573100 | -0.10820400 |
| H  | -0.92600900 | -2.14332700 | 0.77693000  |
| N  | -1.95418300 | 0.69149700  | -0.01997000 |
| H  | -2.26789400 | 1.12619100  | 0.84374300  |
| H  | -2.17577300 | 1.32277100  | -0.78517400 |
| H  | -2.49571000 | -0.16466500 | -0.15649100 |

*cis*-[Pt(OH)(NH<sub>3</sub>)<sub>2</sub>(H<sub>2</sub>O)<sub>2</sub>]<sup>+</sup>

|    |            |             |             |
|----|------------|-------------|-------------|
| Pt | 0.26826200 | 0.00316900  | -0.06146100 |
| N  | 1.52890000 | -1.63119200 | 0.32832500  |
| H  | 0.95253000 | -2.47048500 | 0.36071800  |
| H  | 2.01037800 | -1.57744600 | 1.22220100  |
| H  | 2.23614700 | -1.78186700 | -0.38663400 |
| N  | 1.58748600 | 1.51413600  | 0.30752100  |
| H  | 2.02672300 | 1.48483500  | 1.22395800  |
| H  | 0.99370700 | 2.34654900  | 0.26945300  |
| H  | 2.32033300 | 1.61481200  | -0.39004200 |

|   |             |             |             |
|---|-------------|-------------|-------------|
| H | -2.07739600 | -0.99508800 | 0.00988800  |
| O | -1.22168400 | -1.41188300 | -0.37409900 |
| H | -1.38538400 | -1.58159100 | -1.31055700 |
| O | -1.01480300 | 1.50513900  | -0.31203500 |
| H | -1.10292500 | 1.72559100  | -1.24660200 |
| O | -3.03377800 | 0.01317800  | 0.64790800  |
| H | -3.98243000 | 0.12329800  | 0.53500300  |
| H | -2.56874400 | 0.83209400  | 0.36147400  |

TS

|    |             |             |             |
|----|-------------|-------------|-------------|
| Pt | 0.19193500  | 0.02569400  | -0.00512800 |
| N  | 2.21314900  | -0.02344500 | 0.11392200  |
| N  | -0.07188900 | 2.06057900  | -0.47228000 |
| O  | -1.83170400 | -1.10284600 | -0.95106400 |
| H  | 2.68312200  | 0.29874200  | -0.72771700 |
| H  | 2.59975500  | 0.47431400  | 0.91157400  |
| H  | -0.97652000 | 2.31137800  | -0.07434900 |
| H  | -0.11559800 | 2.24077800  | -1.47207300 |
| H  | -1.95651500 | -1.18837000 | -1.90321300 |
| H  | 2.40503900  | -1.02221500 | 0.22907400  |
| H  | 0.61397500  | 2.70132700  | -0.08422900 |
| H  | -1.30479800 | -1.87585500 | -0.65558100 |
| O  | -2.13445200 | 0.68125200  | 0.98652500  |
| H  | -2.35845300 | 0.60257500  | 1.92061100  |
| H  | -2.66913100 | 0.03055100  | 0.50894900  |
| O  | 0.33317600  | -1.91818100 | 0.33781500  |
| H  | 0.18322800  | -2.11912400 | 1.26925000  |

*cis*-[Pt(OH)(NH<sub>3</sub>)<sub>2</sub>]<sup>+</sup>

|    |             |             |             |
|----|-------------|-------------|-------------|
| Pt | 0.01107800  | -0.17513900 | 0.00339600  |
| N  | -2.11818700 | -0.08023100 | -0.00478600 |
| H  | -2.50848400 | -0.80619400 | 0.59371200  |
| H  | -2.49197500 | -0.24378200 | -0.93791300 |
| H  | -2.52595700 | 0.79234400  | 0.32151900  |
| N  | 0.36199400  | 1.79690100  | 0.00345500  |
| H  | -0.10601400 | 2.28601500  | -0.75639100 |
| H  | 1.37278000  | 1.86949600  | -0.14220200 |
| H  | 0.12860800  | 2.24659900  | 0.88626100  |
| O  | 1.90594900  | -0.48402000 | -0.12065200 |
| H  | 2.31269500  | -0.62818000 | 0.74469700  |

*trans*-[Pt(OH)(NH<sub>3</sub>)<sub>2</sub>]<sup>+</sup>

|    |             |             |             |
|----|-------------|-------------|-------------|
| Pt | 0.00000000  | -0.18300700 | 0.00868900  |
| N  | -2.06492900 | -0.10083300 | -0.02359100 |
| H  | -2.47950200 | -0.64325700 | -0.77878300 |



|   |             |             |             |
|---|-------------|-------------|-------------|
| H | -2.31065000 | 0.87673500  | -0.18308300 |
| H | -2.50655500 | -0.39440700 | 0.84496800  |
| O | -0.00000400 | 1.74025500  | -0.11332800 |
| H | -0.00001000 | 2.08599300  | 0.79296900  |
| N | 2.06493000  | -0.10082800 | -0.02359000 |
| H | 2.50655800  | -0.39441200 | 0.84496400  |
| H | 2.47950100  | -0.64324600 | -0.77878900 |
| H | 2.31065300  | 0.87674000  | -0.18307500 |

Table S4. Cartesian coordinates of Pt<sup>II</sup>-complexes and related species of species partaking the potential energy profile for the reaction of *cis*- and *trans*-[PtCl(NH<sub>3</sub>)<sub>2</sub>(H<sub>2</sub>O)]<sup>+</sup> with TA.

TA

|   |             |             |             |
|---|-------------|-------------|-------------|
| C | -2.60851600 | -0.04019600 | 0.23624800  |
| C | -0.53711500 | -1.18689800 | -0.20931600 |
| C | -0.58261300 | 1.21986700  | -0.10026200 |
| C | -1.94844100 | 1.18030600  | 0.15713000  |
| C | -1.90151900 | -1.22328900 | 0.05225500  |
| H | 0.01543700  | -2.10650200 | -0.36591700 |
| H | -0.06376100 | 2.16929000  | -0.16726900 |
| H | -2.49580200 | 2.10614200  | 0.29447000  |
| H | -2.41348200 | -2.17751300 | 0.10650500  |
| H | -3.67394700 | -0.07009400 | 0.43499700  |
| C | 0.12962400  | 0.03548100  | -0.28093600 |
| S | 1.88383700  | 0.08562800  | -0.62533600 |
| C | 2.52666200  | -0.12021800 | 1.06466500  |
| H | 2.20422600  | -1.07193000 | 1.48833600  |
| H | 3.61505800  | -0.11094600 | 0.99115600  |
| H | 2.20238700  | 0.70118100  | 1.70438800  |

*cis*-[PtCl(NH<sub>3</sub>)<sub>2</sub>(H<sub>2</sub>O)]<sup>+</sup>

|    |             |             |             |
|----|-------------|-------------|-------------|
| Pt | -0.15055800 | -0.02333000 | 0.00000000  |
| N  | 0.06338400  | -2.05179100 | 0.00000100  |
| N  | -2.26837700 | -0.02720600 | -0.00000100 |
| Cl | 2.13768100  | 0.11405800  | 0.00000100  |
| O  | -0.25453100 | 2.09585000  | -0.00000100 |
| H  | -0.32662000 | -2.50282000 | 0.82546100  |
| H  | -0.32662000 | -2.50282100 | -0.82545900 |
| H  | -2.67779600 | -0.46976700 | -0.81999200 |
| H  | -2.59556900 | 0.93802200  | -0.00000100 |
| H  | 0.20446000  | 2.45582100  | 0.77066200  |
| H  | 1.06959700  | -2.23753100 | 0.00000100  |
| H  | -2.67779700 | -0.46976700 | 0.81999100  |
| H  | 0.20446000  | 2.45582000  | -0.77066400 |

*trans*-[PtCl(NH<sub>3</sub>)<sub>2</sub>(H<sub>2</sub>O)]<sup>+</sup>

|    |             |             |             |
|----|-------------|-------------|-------------|
| Pt | 0.13908100  | 0.01042600  | 0.00000600  |
| N  | -0.04452600 | 2.08297900  | 0.00001800  |
| H  | -1.04423900 | 2.29380800  | -0.00003800 |
| H  | 0.35383600  | 2.53030500  | -0.82296400 |
| H  | 0.35373700  | 2.53028100  | 0.82306200  |
| Cl | -2.12543100 | -0.09518000 | -0.00009000 |
| O  | 2.31363100  | 0.00813500  | 0.00009300  |
| H  | 2.81393600  | 0.26107800  | -0.78141500 |
| H  | 2.81387400  | 0.26105900  | 0.78164600  |
| N  | 0.18374000  | -2.06057300 | -0.00001000 |
| H  | 1.12334500  | -2.45173100 | 0.00000700  |
| H  | -0.30700600 | -2.42094300 | -0.81715600 |
| H  | -0.30703800 | -2.42095500 | 0.81711200  |

*cis*-[PtCl(NH<sub>3</sub>)<sub>2</sub>(H<sub>2</sub>O)]<sup>+</sup>·TA

|    |             |             |             |
|----|-------------|-------------|-------------|
| Pt | 1.14304300  | -0.18241600 | -0.20994100 |
| O  | 0.64075200  | 1.19274600  | -1.71868200 |
| H  | 1.26045200  | 1.93236800  | -1.73651000 |
| S  | -2.23049800 | 1.84478600  | -0.69177600 |
| H  | -0.25374900 | 1.56656800  | -1.49652800 |
| C  | -1.88850300 | 2.90626800  | 0.73570500  |
| H  | -0.90916500 | 2.69617900  | 1.16569200  |
| H  | -1.90265500 | 3.92475500  | 0.34756800  |
| H  | -2.67978300 | 2.80263900  | 1.47772000  |
| C  | -2.25399900 | 0.20171600  | -0.00548100 |
| C  | -1.91404700 | -0.09726600 | 1.31228500  |
| C  | -2.61866700 | -0.83024100 | -0.87556100 |
| C  | -1.93203500 | -1.41961100 | 1.74910500  |
| H  | -1.63330700 | 0.68491500  | 2.00535500  |
| C  | -2.61518900 | -2.14820100 | -0.43656400 |
| H  | -2.92552500 | -0.60000500 | -1.89097500 |
| C  | -2.26517500 | -2.45082700 | 0.87891800  |
| H  | -1.70709600 | -1.63508700 | 2.78867000  |
| H  | -2.92881500 | -2.93694600 | -1.11205200 |
| H  | -2.30148800 | -3.47541600 | 1.23094800  |
| N  | 0.61220300  | -1.68413700 | -1.57823300 |
| H  | 0.46893500  | -1.25037800 | -2.48870400 |
| H  | 1.30494200  | -2.41706700 | -1.70720800 |
| H  | -0.27301400 | -2.11934300 | -1.31311100 |
| Cl | 1.68349200  | 1.54127800  | 1.22577700  |
| N  | 1.56977500  | -1.47714200 | 1.31034100  |
| H  | 0.72997300  | -1.97668100 | 1.60266600  |
| H  | 2.29986700  | -2.15496000 | 1.10371600  |
| H  | 1.88752900  | -0.91546300 | 2.10259600  |

*trans*-[PtCl(NH<sub>3</sub>)<sub>2</sub>(H<sub>2</sub>O)]<sup>+</sup>·TA

|    |             |             |             |
|----|-------------|-------------|-------------|
| Pt | 1.26906500  | 0.02520300  | -0.25935800 |
| N  | 2.56567700  | 1.30532000  | 0.73352600  |
| O  | 0.47336800  | 1.72782000  | -1.28193400 |
| H  | 2.39015600  | 2.28679500  | 0.52982700  |
| H  | 3.52624400  | 1.09597200  | 0.46675700  |
| H  | 2.50752900  | 1.16865000  | 1.74084700  |
| H  | 0.56559400  | 1.80067300  | -2.23598500 |
| S  | -2.33872600 | 2.06203400  | -0.06105900 |
| H  | -0.46851000 | 1.92339100  | -1.02952900 |
| C  | -1.70366600 | 2.59987800  | 1.54692600  |
| H  | -0.72366400 | 2.16934700  | 1.75686200  |
| H  | -1.61795600 | 3.68460300  | 1.48487500  |
| H  | -2.41081900 | 2.34367600  | 2.33517900  |
| C  | -2.55194300 | 0.30139400  | 0.14336200  |
| C  | -2.03366700 | -0.42254200 | 1.21431500  |
| C  | -3.25670300 | -0.35887800 | -0.86762900 |
| C  | -2.22157800 | -1.80055600 | 1.27243000  |
| H  | -1.48498500 | 0.06488800  | 2.00927000  |
| C  | -3.43291900 | -1.73641800 | -0.80308600 |
| H  | -3.68949100 | 0.20409400  | -1.68803200 |
| C  | -2.91503700 | -2.46205200 | 0.26659700  |
| H  | -1.81878100 | -2.35343900 | 2.11288200  |
| H  | -3.99307200 | -2.23888900 | -1.58307300 |
| H  | -3.06778900 | -3.53311000 | 0.32362100  |
| Cl | 2.10619500  | -1.71230600 | 0.95487700  |
| N  | 0.04937800  | -1.33514000 | -1.23051300 |
| H  | -0.91225000 | -1.01601200 | -1.35746800 |
| H  | 0.42039400  | -1.61038300 | -2.13714900 |
| H  | 0.00538700  | -2.17823700 | -0.65804100 |

*cis*-TS

|    |             |             |             |
|----|-------------|-------------|-------------|
| Pt | -1.08307500 | -0.44109800 | 0.01633800  |
| O  | -0.82432200 | -0.07445100 | 2.38022000  |
| H  | -0.72233200 | 0.86792200  | 2.55262700  |
| H  | -1.64156600 | -0.33264600 | 2.81853800  |
| S  | 0.76966700  | 1.70212100  | 0.43306300  |
| C  | 2.24290000  | 0.77602900  | 0.06959900  |
| C  | 2.94923200  | 0.27432500  | 1.16426400  |
| C  | 2.65106000  | 0.46047500  | -1.22565000 |
| C  | 4.04674900  | -0.55326500 | 0.96057500  |
| H  | 2.64978900  | 0.54068700  | 2.17249300  |
| C  | 3.76125800  | -0.35725100 | -1.41816700 |
| H  | 2.12518100  | 0.85594200  | -2.08599800 |
| C  | 4.45527100  | -0.87370900 | -0.32992900 |
| H  | 4.59471100  | -0.93244000 | 1.81526200  |
| H  | 4.08647900  | -0.58311400 | -2.42720000 |

|    |             |             |             |
|----|-------------|-------------|-------------|
| H  | 5.32059800  | -1.50622400 | -0.48640700 |
| C  | 0.42997800  | 2.65977700  | -1.06282900 |
| H  | 0.21502300  | 2.01376000  | -1.91211800 |
| H  | -0.46550300 | 3.23687300  | -0.83403100 |
| H  | 1.26343600  | 3.32900100  | -1.27260700 |
| N  | 0.47659000  | -1.83289400 | 0.23158200  |
| H  | 1.28596900  | -1.57743900 | -0.33619400 |
| H  | 0.78810400  | -1.79984700 | 1.20150700  |
| H  | 0.24311800  | -2.80078800 | 0.02806700  |
| Cl | -2.78587400 | 1.11122400  | -0.12085100 |
| N  | -1.96227500 | -1.35244300 | -1.61357800 |
| H  | -1.35847000 | -1.41462900 | -2.42928800 |
| H  | -2.32463600 | -2.28064100 | -1.40963100 |
| H  | -2.75916500 | -0.76086200 | -1.85890300 |

*trans*-TS

|    |             |             |             |
|----|-------------|-------------|-------------|
| Pt | -1.13886900 | -0.11908400 | 0.22033600  |
| N  | -2.62091700 | 1.11059800  | -0.56595000 |
| O  | -0.69207200 | 1.19821300  | 2.27750400  |
| H  | -3.13226500 | 1.62403800  | 0.14802600  |
| H  | -3.28882400 | 0.51016600  | -1.05144300 |
| H  | -0.33160000 | 2.08928000  | 2.26438500  |
| H  | -2.27502900 | 1.78482200  | -1.24389500 |
| H  | -1.29189600 | 1.14388600  | 3.02603500  |
| S  | 0.96562500  | 1.83908000  | -0.32117400 |
| C  | 2.25552900  | 0.61213800  | -0.25638200 |
| C  | 3.05087300  | 0.59160200  | 0.88787700  |
| C  | 2.42951700  | -0.35181400 | -1.24892300 |
| C  | 4.00898000  | -0.40363300 | 1.04455100  |
| H  | 2.93524900  | 1.35795600  | 1.64654300  |
| C  | 3.40304700  | -1.33290200 | -1.08932900 |
| H  | 1.81199700  | -0.35348500 | -2.13884800 |
| C  | 4.18767600  | -1.36733500 | 0.05853600  |
| H  | 4.62976100  | -0.41215300 | 1.93282000  |
| H  | 3.54239900  | -2.07471200 | -1.86703200 |
| H  | 4.94357700  | -2.13413600 | 0.17683700  |
| C  | 0.70842700  | 2.09349300  | -2.09760200 |
| H  | 0.20796800  | 1.24238400  | -2.55873200 |
| H  | 0.08846500  | 2.98566200  | -2.19356500 |
| H  | 1.66646600  | 2.28285800  | -2.58063200 |
| N  | 0.23733500  | -1.44750400 | 0.99384100  |
| H  | 1.01053500  | -1.58988500 | 0.34271400  |
| H  | 0.63403700  | -1.10992000 | 1.86840500  |
| Cl | -2.09496800 | -1.84746100 | -0.94031200 |
| H  | -0.19728400 | -2.35332700 | 1.15859900  |

*cis*-[PtCl(NH<sub>3</sub>)<sub>2</sub>(TA)]<sup>+</sup>·H<sub>2</sub>O

|    |             |            |             |
|----|-------------|------------|-------------|
| Pt | -0.95258100 | 0.08554600 | -0.02893700 |
|----|-------------|------------|-------------|

|    |             |             |             |
|----|-------------|-------------|-------------|
| N  | -1.35149200 | -1.98122100 | 0.10071800  |
| N  | -2.63097100 | 0.38928400  | -1.24923700 |
| H  | -2.37866900 | 0.31090400  | -2.23176200 |
| H  | -3.40481600 | -0.24974400 | -1.05545100 |
| Cl | -0.63430800 | 2.37045700  | -0.21969900 |
| H  | -2.94306100 | 1.34861800  | -1.10448100 |
| H  | -1.03028900 | -2.37508600 | 0.98200300  |
| H  | -2.35669600 | -2.16476900 | 0.02994400  |
| H  | -0.88361400 | -2.49613800 | -0.64169400 |
| S  | 0.90331400  | -0.26208700 | 1.33479700  |
| C  | 1.24483500  | 1.24353600  | 2.28992600  |
| H  | 2.12993200  | 1.04347300  | 2.89217900  |
| H  | 1.39633000  | 2.08232100  | 1.61538300  |
| H  | 0.37776500  | 1.42466900  | 2.92341500  |
| C  | 2.34120100  | -0.35807900 | 0.26417100  |
| C  | 3.23389500  | -1.40033800 | 0.49115800  |
| C  | 2.56530800  | 0.58672800  | -0.73363000 |
| C  | 4.37455100  | -1.49630800 | -0.29855500 |
| H  | 3.04880100  | -2.12272600 | 1.27807400  |
| C  | 3.71069300  | 0.48103500  | -1.50942000 |
| H  | 1.85796900  | 1.39065000  | -0.90118700 |
| C  | 4.61210300  | -0.55724300 | -1.29409800 |
| H  | 5.07926100  | -2.30122800 | -0.12766600 |
| H  | 3.89881400  | 1.21305900  | -2.28559900 |
| H  | 5.50478400  | -0.63233000 | -1.90371700 |
| O  | -4.32162500 | -1.87120000 | -0.23061800 |
| H  | -4.86807000 | -2.45849200 | -0.75974000 |
| H  | -4.84217300 | -1.67298600 | 0.55278000  |

*trans*-[PtCl(NH<sub>3</sub>)<sub>2</sub>(TA)]<sup>+</sup>·H<sub>2</sub>O

|    |             |             |             |
|----|-------------|-------------|-------------|
| Pt | 1.08917700  | -0.04348800 | -0.10725600 |
| N  | 0.04507600  | -1.77596300 | -0.57830100 |
| H  | -0.09460400 | -1.87421000 | -1.58187600 |
| H  | 0.61955400  | -2.56321100 | -0.27551300 |
| H  | -0.86616400 | -1.84746500 | -0.12772900 |
| S  | -0.76141500 | 1.32550500  | -0.57428200 |
| C  | -0.81032200 | 2.65630100  | 0.66438700  |
| H  | -1.76967000 | 3.16223800  | 0.56602500  |
| H  | -0.68800400 | 2.25916500  | 1.67041400  |
| H  | -0.01215900 | 3.35782600  | 0.42131600  |
| C  | -2.21722400 | 0.37900000  | -0.12422500 |
| C  | -3.19257400 | 0.20296300  | -1.09896100 |
| C  | -2.35858500 | -0.17567900 | 1.14803200  |
| C  | -4.32796800 | -0.54241000 | -0.79307600 |
| H  | -3.07406000 | 0.64747500  | -2.08038800 |
| C  | -3.49832000 | -0.91057800 | 1.44202800  |
| H  | -1.58606700 | -0.04439500 | 1.89831800  |
| C  | -4.48070800 | -1.09485500 | 0.47138400  |
| H  | -5.09447600 | -0.68202100 | -1.54571400 |

|    |             |             |             |
|----|-------------|-------------|-------------|
| H  | -3.62023600 | -1.34103700 | 2.42877500  |
| H  | -5.36906900 | -1.66877000 | 0.70648400  |
| N  | 2.35173000  | 1.54144200  | 0.38434900  |
| H  | 3.25872800  | 1.11354500  | 0.58089700  |
| H  | 2.48998900  | 2.20763500  | -0.37229100 |
| Cl | 2.91139400  | -1.41454100 | 0.30292500  |
| H  | 2.07592200  | 2.05756300  | 1.21625500  |
| O  | 0.25471147  | -1.06730060 | -2.83422777 |
| H  | 0.94712240  | -0.92846523 | -3.48452912 |
| H  | 0.10406951  | -0.24736903 | -2.35818237 |

*cis*-[PtCl(NH<sub>3</sub>)<sub>2</sub>(TA)]<sup>+</sup>

|    |             |             |             |
|----|-------------|-------------|-------------|
| Pt | -1.15843300 | -0.24105900 | -0.04980100 |
| N  | -0.99613100 | -2.34880100 | 0.13137900  |
| N  | -2.83473000 | -0.34105700 | -1.32468400 |
| H  | -2.66375500 | -0.81845700 | -2.20654700 |
| H  | -3.66121300 | -0.74987400 | -0.89496800 |
| Cl | -1.37023300 | 2.04323400  | -0.30066600 |
| H  | -3.05940600 | 0.63116600  | -1.54520000 |
| H  | -0.82788900 | -2.62013800 | 1.09835300  |
| H  | -1.82004700 | -2.86079800 | -0.17293800 |
| H  | -0.21109500 | -2.69721800 | -0.41618300 |
| S  | 0.67784100  | -0.10479700 | 1.37280200  |
| C  | 0.71721700  | 1.50891400  | 2.20089200  |
| H  | 1.59310300  | 1.50761600  | 2.84827300  |
| H  | 0.76101900  | 2.30679000  | 1.46454900  |
| H  | -0.19765200 | 1.58940700  | 2.78595900  |
| C  | 2.12168200  | -0.03794900 | 0.30993100  |
| C  | 3.13847900  | -0.95252000 | 0.56289100  |
| C  | 2.22087500  | 0.89556700  | -0.71886400 |
| C  | 4.27800800  | -0.93226300 | -0.23442600 |
| H  | 3.05140900  | -1.66338100 | 1.37689300  |
| C  | 3.36825700  | 0.91045900  | -1.49851400 |
| H  | 1.41663500  | 1.59746900  | -0.90870200 |
| C  | 4.39199000  | -0.00253200 | -1.25985400 |
| H  | 5.07732200  | -1.63856800 | -0.04527900 |
| H  | 3.46105200  | 1.63645200  | -2.29726300 |
| H  | 5.28374900  | 0.01488500  | -1.87518400 |

*trans*-[PtCl(NH<sub>3</sub>)<sub>2</sub>(TA)]<sup>+</sup>

|    |             |             |             |
|----|-------------|-------------|-------------|
| Pt | 1.08917700  | -0.04348800 | -0.10725600 |
| N  | 0.04507600  | -1.77596300 | -0.57830100 |
| H  | -0.09460400 | -1.87421000 | -1.58187600 |
| H  | 0.61955400  | -2.56321100 | -0.27551300 |
| H  | -0.86616400 | -1.84746500 | -0.12772900 |
| S  | -0.76141500 | 1.32550500  | -0.57428200 |

|    |             |             |             |
|----|-------------|-------------|-------------|
| C  | -0.81032200 | 2.65630100  | 0.66438700  |
| H  | -1.76967000 | 3.16223800  | 0.56602500  |
| H  | -0.68800400 | 2.25916500  | 1.67041400  |
| H  | -0.01215900 | 3.35782600  | 0.42131600  |
| C  | -2.21722400 | 0.37900000  | -0.12422500 |
| C  | -3.19257400 | 0.20296300  | -1.09896100 |
| C  | -2.35858500 | -0.17567900 | 1.14803200  |
| C  | -4.32796800 | -0.54241000 | -0.79307600 |
| H  | -3.07406000 | 0.64747500  | -2.08038800 |
| C  | -3.49832000 | -0.91057800 | 1.44202800  |
| H  | -1.58606700 | -0.04439500 | 1.89831800  |
| C  | -4.48070800 | -1.09485500 | 0.47138400  |
| H  | -5.09447600 | -0.68202100 | -1.54571400 |
| H  | -3.62023600 | -1.34103700 | 2.42877500  |
| H  | -5.36906900 | -1.66877000 | 0.70648400  |
| N  | 2.35173000  | 1.54144200  | 0.38434900  |
| H  | 3.25872800  | 1.11354500  | 0.58089700  |
| H  | 2.48998900  | 2.20763500  | -0.37229100 |
| C1 | 2.91139400  | -1.41454100 | 0.30292500  |
| H  | 2.07592200  | 2.05756300  | 1.21625500  |
